# Supplementary material
Source: ML conference proceedings conference paper supplement (https://proceedings.neurips.cc/paper_files/paper/2008/hash/a87ff679a2f3e71d9181a67b7542122c-Abstract.html)
Supplement: Supplementary file 1 [file a87ff679a2f3e71d9181a67b7542122c-Supplemental.zip]

## A Proof of asymptotic convergence

This short proof consists in showing that the above assumptions satisfy conditions C1 through C5 of [21], as well as convergence of the non-stationary target to a fixed point. Our proof borrows elements from [24].

1. Since we have a convex program, the solution must be unique globally (see, for instance, Theorem 18 of [6]).
2. By convexity, second-order conditions are satisfied automatically. Constraint qualifications ensure that a linear approximation of the constraints properly characterizes the set of feasible search directions (and that strong duality holds [2]), thereby guaranteeing that the set of feasible descent directions is empty at  $x^*$ . Strict complementarity avoids complications in stating sufficient optimality conditions. One sufficient condition for first-order constraint qualification is that the gradient vectors  $\nabla c_i(x)$  restricted to active inequality constraints  $i$  are linearly independent. Under the above regularity assumptions,  $\theta^*$  is isolated and unique by second-order sufficiency (Theorem 4 of [6]) and, furthermore, by the Kuhn-Tucker Sufficiency Theorem [6], the unperturbed KKT conditions (4) are satisfied for some  $z^* \geq 0$ .
3. Assumption 2 with  $c_k = 1$  immediately implies Condition C1. The choice of  $c_k$  makes no difference in the gradient-based case; Spall [20] describes the role of  $c_k$  in the simultaneous perturbation algorithm. Note that the condition is applied to the maximum step sizes  $\hat{a}_k$  (see Fig. 1), not the feasible step sizes  $a_k \leq \hat{a}_k$ . C2 is satisfied by the martingale difference assumption (see [20]).
4. Convexity of the objective  $f(x)$  and constraints  $c(x)$  implies convexity of the barrier function (3) because  $-\log(-u)$  is convex and monotonically increasing in  $u$  [2]. By similar logic, the gradient of the barrier function is Lipschitz-continuous.
5. Theorem 25 of [6] or Theorem 3.12 of [7], convexity, strict complementarity, constraint qualifications and existence of the KKT solution  $\theta^*$  imply that unconstrained minimizers exist for all nonlinear systems  $F_\mu(x, z) = 0$ , the minimizer is isolated at  $\mu = 0$ , and every limit point of the time-varying target and barrier trajectory  $\{x_\mu^*\}$  converges in norm to  $x^*$  as long as  $\sigma_k \rightarrow 0$ . Due to continuity of the barrier function, condition C4 holds because the individual coordinates  $x_{k,i}$  clearly satisfy  $|x_{k+1,i} - x_{k,i}| < |x_i^* - x_{k,i}|$  when  $k$  is large and when the iterate is bounded away from the solution (see [24])—and similarly for the components of  $z_k$ . C5 is guaranteed by having bounded iterates in combination with the other assumptions [20].
6. Convexity of the barrier function and boundedness of the gradient imply that the Newton step  $(\Delta x_k, \Delta z_k)$  with gradient estimate  $y_k$  is sufficiently steep to push iterates toward  $(x_\mu^*, z_\mu^*)$  (Condition C3).<sup>4</sup> However, this doesn't quite satisfy C3 as the step at iteration  $k$  is actually  $(a_k \Delta x_k, a_k \Delta z_k)/\hat{a}_k$ , so we need to show  $\hat{a}_k > 0$  implies  $a_k > 0$ . Under the same assumptions of strict complementarity and first-order constraint qualification, El-Bakry *et al.* establish local convergence by deriving a bound on the step size, presented here with slight modification to fit the formulation of our algorithm:

$$a_k = \min\{1, \tau_k + O(\|F_\mu(x_k, z_k)\|) + O(\mu_k/\min_i(z_i c(x_i)))\}, \quad (14)$$

where  $y = O(x)$  means that the sequence  $x$  bounds the sequence  $y$  from above [13], and  $\tau_k$  is the largest number guaranteeing that  $a_k$  remains smaller than  $\hat{a}_k$ .<sup>5</sup> This identity applies without modification when  $\nabla f(x_k)$  is replaced by  $y_k$ . Therefore, unbiased gradient estimates  $y_k$  will eventually produce a search direction with nonzero step sizes  $a_k$ , and condition C3 holds. The proof is complete.

<sup>4</sup>A differentiable function  $f(x)$  is convex if and only if for all  $x$ ,  $f(x^*) \geq f(x) + \nabla f(x)^T(x^* - x)$  as shown in [2], which implies  $(x - x^*)\nabla f(x) \geq 0$ .

<sup>5</sup>See: A. S. El-Bakry, R. A. Tapia, T. Tsuchiya, and Y. Zhang, *On the formulation and theory of the Newton interior-point method for nonlinear programming*, Journal of Optimization Theory and Applications, 89 (1996), pp. 507–541.

## B Stability of primal-dual iterates near the central path

In this section, we take a few moments to step through Wright’s [26] line of reasoning that establishes some vital stability properties of primal-dual iterates that closely follow the central path. The key points of [26] are as follows:

1. When solving for  $x$  in  $Ax = b$  using a backward stable algorithm (e.g. the Cholesky factorization), the computed solution can be characterized as the exact solution to a system with perturbed matrix  $A$  and vector  $b$  [23]. Provided the iterate  $(x, z)$  is within a small  $\delta$ -neighbourhood of the central path but not too close to the boundary of the feasible region (*i.e.*  $c(x)$  is asymptotically bounded from below by  $\delta$ ), and  $\mu = O(\delta)$ , then the perturbation in the computed value of  $b = -\nabla f_\mu(x)$  is on the order of  $\epsilon$ , and the perturbation in  $A = W - J^T \Sigma J$  is roughly proportional to  $\epsilon_{\text{machine}}/\delta$ . Considering the poor condition number of  $A$ , this is not a good result. The next four points shed a more favourable light.
2. The matrix  $A$  is almost entirely dominated by a matrix that lies in the space spanned by the gradient vectors  $\nabla c_i(x)$  of the active constraints  $i$ , and likewise for  $b$ . The perturbations of  $A$  and  $b$  are also restricted to this space. This is fortunate because this space corresponds precisely to a *well-conditioned invariant subspace of  $A$* .
3. The (relative) condition numbers of the matrix-vector products  $Ax$  and  $x = A^{-1}b$  are bounded from above by  $\kappa(A) \equiv \|A\| \|A^{-1}\|$ , where  $\|A\|$  is an induced matrix norm of  $A$  [23]. The problem is that  $A$ —the matrix arising in the reduced system (6)—is notoriously ill-conditioned as  $\mu$  approaches 0. Fortunately, we are able to derive a tighter bound by exploiting special structure within the matrix.
4. By dividing the singular values of a matrix into a group of large singular values and a group of small singular values ( $A = U\Sigma V$  where  $\Sigma$  has diagonal sub-blocks  $\Sigma_{\text{large}}$  and  $\Sigma_{\text{small}}$ ), the relative condition number of  $x$  projected onto the invariant subspace of  $\Sigma_{\text{large}}$  is bounded by  $\kappa(\Sigma_{\text{large}})$ . When the separation of the singular values within each group is much smaller than the separation of the full set, then the bound  $\kappa(\Sigma_{\text{large}})$  is much tighter than the bound  $\kappa(A)$ .
5. The matrix in (6) possesses precisely these properties. Collecting all the evidence, the solution  $\Delta x$  projected onto the range space of active constraints has perturbations on the order of  $\delta\epsilon + \epsilon_{\text{machine}}$ , a factor of  $\delta$  better than the bound stated above. The error bounds for the remaining portion of  $\Delta x$  are worse,  $O(\delta\epsilon + \epsilon_{\text{machine}}/\delta)$ , but it is precisely this portion—the projection onto the null space of the Jacobian of the active constraints—that has negligible impact on determination of the first-order KKT conditions near the solution [13, Theorem 12.1]. (Note these error bounds are of little use when  $J$  is ill-conditioned.)
6. Finally, Wright [26] applies analogous analysis to the dual search direction to show that the computed value of  $\Delta z$  in (7) has a similar condition number.

In conclusion, an off-the-shelf backward stable Cholesky factorization can be used to solve (6) so long as the iterates are feasible.

Of concern is the ill-effect of *cancellation* in the constraints near  $c_i(x) = 0$  (see Example 12.3 of [23]), but we defer the issue since cancellation did not arise in our experiments. Note that even though the full system (5) is well-conditioned, the solution is not any more accurate because the right-hand side incurs cancellation errors. S. J. Wright presents an alternate derivation of stability that does not require the linear independence constraint qualification.<sup>6</sup>

---

<sup>6</sup>See: S. J. Wright, *Effects of finite-precision arithmetic on interior-point methods for nonlinear programming*, SIAM Journal on Optimization, 12 (2001), pp. 36–78.
