# Supplementary material
Source: ML conference proceedings conference paper supplement (https://proceedings.neurips.cc/paper_files/paper/2008/hash/a87ff679a2f3e71d9181a67b7542122c-Abstract.html)
Supplement: Supplementary file 2 [file a87ff679a2f3e71d9181a67b7542122c-Supplemental.zip]

Archive with 1 entries (1 files):
- appendix.pdf
